# Supplementary material for: Healthcare professionals’ knowledge of the systematic ABCDE approach: a cross-sectional study
Source: PubMed Central journal article supplement (PMC9743501; doi:10.1186/s12873-022-00753-y), 2022-12-12
Supplement: 12873_2022_753_MOESM2_ESM.pdf [file 12873_2022_753_MOESM2_ESM.pdf]

## Additional file 2. Regression analysis

Knowledge test ABCDE approach

| Question  | Correct answer |            | Maximum score achieved |         |
|-----------|----------------|------------|------------------------|---------|
|           | mean           | stand.dev. | lowest                 | highest |
| Testscore | 23,24          | 3,54       | 13,00                  | 29,00   |
| Correct   | 23,24          | 3,53       | 13,00                  | 29,00   |
| Incorrect | 5,76           | 3,53       | 16,00                  | 0,00    |
| Open      | 0,00           | 0,00       | 0                      | 0       |

### ITEMANALYSIS SUMMARY

|                        | mean | stand.dev. | lowest | highest |
|------------------------|------|------------|--------|---------|
| Proportion correct     | 0,80 | 0,16       | 0,40   | 1,00    |
| Idem corrected         | 0,73 | 0,22       | 0,10   | 1,00    |
| Item-total correlation | 0,32 | 0,14       | 0,09   | 0,58    |
| Item-rest correlation  | 0,23 | 0,13       | 0,02   | 0,48    |

|                    |      |
|--------------------|------|
| coefficient alpha: | 0,71 |
| standard error:    | 1,90 |

PROBABILITY SCORE

8,08

### TEST CHARACTERISTICS

|                           |     |
|---------------------------|-----|
| Total number of items     | 29  |
| Number of items excluded  | 0   |
| Eventual number of items  | 29  |
| Number of 2-choice items: | 1   |
| Number of 3-choice items: | 7   |
| Number of 4-choice items: | 21  |
| Number of 5-choice items: | 0   |
| Number of alternatives    | 107 |
| Number of participants    | 240 |

Additional file 2. Regression analysis

ITEMANALYSIS

| Question | Correct answer | Maximum possible score | Maximum score achieved | Minimum score achieved | Mean score | Stand.Dev. | p    | p*   | Rit  | Rir  | open | 1 |     | 2    |     | 3     |     | 4     |    |       |
|----------|----------------|------------------------|------------------------|------------------------|------------|------------|------|------|------|------|------|---|-----|------|-----|-------|-----|-------|----|-------|
|          |                |                        |                        |                        |            |            |      |      |      |      |      | f | z   | f    | z   | f     | z   | f     | z  |       |
| 1        | 1              | 1                      | 1                      | 0,00                   | 0,72       | 0,45       | 0,72 | 0,62 | 0,35 | 0,23 | 0    | * | 172 | 0,14 | 6   | -0,89 | 3   | -1,92 | 59 | -0,23 |
| 2        | 1              | 1                      | 1                      | 0,00                   | 0,77       | 0,42       | 0,77 | 0,66 | 0,41 | 0,31 | 0    | * | 185 | 0,17 | 26  | -1,07 | 29  | -0,10 |    |       |
| 3        | 1              | 1                      | 1                      | 0,00                   | 0,93       | 0,25       | 0,93 | 0,90 | 0,24 | 0,17 | 0    | * | 224 | 0,04 | 10  | -0,29 | 6   | -1,19 |    |       |
| 4        | 1              | 1                      | 1                      | 1,00                   | 1,00       | 0,00       | 1,00 | 1,00 | *    | *    | 0    | * | 240 | 0,00 | 0   | *     | 0   | *     |    |       |
| 5        | 1              | 1                      | 1                      | 0,00                   | 0,53       | 0,50       | 0,53 | 0,38 | 0,56 | 0,45 | 0    | * | 128 | 0,42 | 89  | -0,44 | 13  | -0,54 | 10 | -0,76 |
| 6        | 1              | 1                      | 1                      | 0,00                   | 0,95       | 0,21       | 0,95 | 0,91 | 0,17 | 0,11 | 0    | * | 229 | 0,02 | 11  | -0,50 |     |       |    |       |
| 7        | 1              | 1                      | 1                      | 0,00                   | 0,93       | 0,25       | 0,93 | 0,91 | 0,09 | 0,02 | 0    | * | 224 | 0,00 | 13  | 0,17  | 2   | -1,22 | 1  | -0,94 |
| 8        | 1              | 1                      | 1                      | 0,00                   | 0,95       | 0,21       | 0,95 | 0,94 | 0,20 | 0,14 | 0    | * | 229 | 0,03 | 3   | 0,01  | 1   | -2,65 | 7  | -0,65 |
| 9        | 1              | 1                      | 1                      | 0,00                   | 0,72       | 0,45       | 0,72 | 0,62 | 0,30 | 0,18 | 0    | * | 172 | 0,11 | 8   | -0,41 | 2   | -0,74 | 58 | -0,25 |
| 10       | 1              | 1                      | 1                      | 0,00                   | 0,81       | 0,39       | 0,81 | 0,74 | 0,47 | 0,38 | 0    | * | 194 | 0,19 | 12  | -0,45 | 24  | -0,96 | 10 | -0,75 |
| 11       | 1              | 1                      | 1                      | 0,00                   | 0,91       | 0,29       | 0,91 | 0,88 | 0,31 | 0,24 | 0    | * | 218 | 0,07 | 0   | *     | 5   | -1,43 | 17 | -0,54 |
| 12       | 1              | 1                      | 1                      | 0,00                   | 0,48       | 0,50       | 0,48 | 0,31 | 0,58 | 0,48 | 0    | * | 116 | 0,49 | 5   | -0,54 | 38  | -0,71 | 81 | -0,33 |
| 13       | 1              | 1                      | 1                      | 0,00                   | 0,85       | 0,36       | 0,85 | 0,79 | 0,27 | 0,17 | 0    | * | 203 | 0,07 | 11  | -0,80 | 2   | -0,40 | 24 | -0,21 |
| 14       | 1              | 1                      | 1                      | 0,00                   | 0,87       | 0,34       | 0,87 | 0,82 | 0,30 | 0,21 | 0    | * | 208 | 0,08 | 9   | -0,08 | 11  | -1,03 | 12 | -0,42 |
| 15       | 1              | 1                      | 1                      | 0,00                   | 0,91       | 0,28       | 0,91 | 0,87 | 0,37 | 0,30 | 0    | * | 219 | 0,09 | 0   | *     | 21  | -0,97 |    |       |
| 16       | 1              | 1                      | 1                      | 0,00                   | 0,78       | 0,41       | 0,78 | 0,71 | 0,17 | 0,05 | 0    | * | 188 | 0,03 | 36  | -0,13 | 9   | 0,35  | 7  | -0,54 |
| 17       | 1              | 1                      | 1                      | 0,00                   | 0,43       | 0,50       | 0,43 | 0,24 | 0,26 | 0,12 | 0    | * | 104 | 0,14 | 120 | -0,04 | 13  | -0,37 | 3  | -1,40 |
| 18       | 1              | 1                      | 1                      | 0,00                   | 0,97       | 0,18       | 0,97 | 0,95 | 0,13 | 0,08 | 0    | * | 232 | 0,01 | 4   | -0,86 | 4   | -0,01 |    |       |
| 19       | 1              | 1                      | 1                      | 0,00                   | 0,70       | 0,46       | 0,70 | 0,59 | 0,56 | 0,46 | 0    | * | 167 | 0,30 | 46  | -0,86 | 27  | -0,41 | 0  | *     |
| 20       | 1              | 1                      | 1                      | 0,00                   | 0,93       | 0,26       | 0,93 | 0,90 | 0,28 | 0,20 | 0    | * | 222 | 0,06 | 8   | -0,85 | 2   | -1,39 | 8  | -0,42 |
| 21       | 1              | 1                      | 1                      | 0,00                   | 0,97       | 0,17       | 0,97 | 0,96 | 0,15 | 0,10 | 0    | * | 233 | 0,02 | 1   | 1,35  | 6   | -0,88 |    |       |
| 22       | 1              | 1                      | 1                      | 0,00                   | 0,83       | 0,38       | 0,83 | 0,77 | 0,32 | 0,22 | 0    | * | 199 | 0,10 | 0   | *     | 24  | -0,23 | 17 | -0,84 |
| 23       | 1              | 1                      | 1                      | 0,00                   | 0,79       | 0,41       | 0,79 | 0,72 | 0,42 | 0,31 | 0    | * | 189 | 0,16 | 29  | -0,64 | 0   | *     | 22 | -0,55 |
| 24       | 1              | 1                      | 1                      | 0,00                   | 0,85       | 0,36       | 0,85 | 0,79 | 0,26 | 0,17 | 0    | * | 203 | 0,07 | 1   | -0,98 | 36  | -0,37 | 0  | *     |
| 25       | 1              | 1                      | 1                      | 0,00                   | 0,83       | 0,37       | 0,83 | 0,78 | 0,18 | 0,07 | 0    | * | 200 | 0,03 | 13  | -0,65 | 17  | 0,25  | 10 | -0,23 |
| 26       | 1              | 1                      | 1                      | 0,00                   | 0,40       | 0,49       | 0,40 | 0,10 | 0,46 | 0,34 | 0    | * | 96  | 0,42 | 20  | -0,63 | 124 | -0,22 |    |       |
| 27       | 1              | 1                      | 1                      | 0,00                   | 0,75       | 0,43       | 0,75 | 0,67 | 0,41 | 0,30 | 0    | * | 181 | 0,17 | 2   | 0,15  | 11  | -0,84 | 46 | -0,47 |
| 28       | 1              | 1                      | 1                      | 0,00                   | 0,85       | 0,36       | 0,85 | 0,79 | 0,49 | 0,41 | 0    | * | 203 | 0,17 | 15  | -1,09 | 7   | -0,80 | 15 | -0,89 |
| 29       | 1              | 1                      | 1                      | 0,00                   | 0,83       | 0,37       | 0,83 | 0,78 | 0,39 | 0,30 | 0    | * | 200 | 0,13 | 37  | -0,62 | 0   | *     | 3  | -1,20 |
